# Supplementary material for: Synthesis, structures and magnetic properties of the dimorphic Mn2CrSbO6oxide
Source: Royal Society of Chemistry journal article supplement (doi:10.1039/c4dt03849e), 2015-01-01
Supplement: c4dt03849e3.pdf [file c4dt03849e3.pdf]

†**Electronic Supplementary Information (ESI) available:** XRD data, HRTEM micrographs in different orientations, magnification of the M(H) data for ilmenite compound, reciprocal susceptibility and  $\chi T$  vs T plots as well as different views of magnetic structures. See DOI: 10.1039/b000000x/

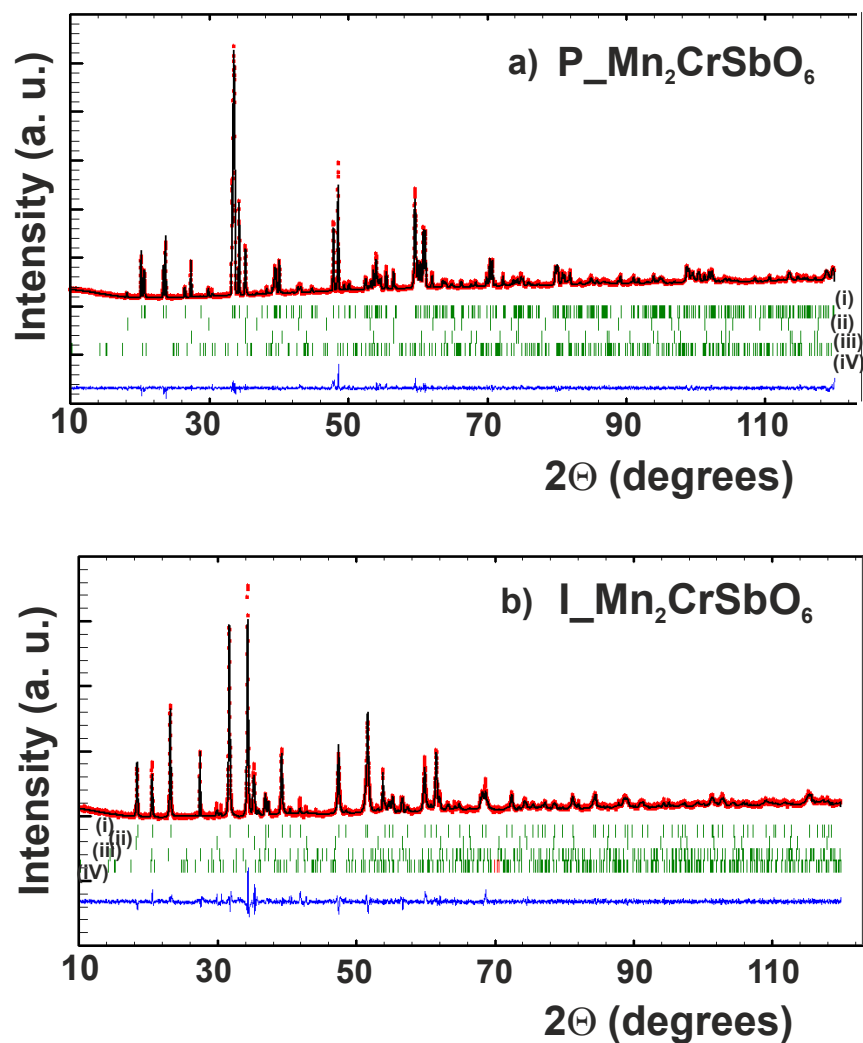

**Figure SF1.** a) Rietveld refinement of the X-ray diffraction pattern of  $P\_Mn_2CrSbO_6$  compound at room temperature (i). Minor secondary phases are  $MnCr_2O_4$  (ii),  $Sb_2O_4$  (iii) and  $Mn_2Sb_2O_7$  (iv). b) Rietveld refinement of the PND pattern of  $I\_Mn_2CrSbO_6$  (i). Impurities are  $MnCr_2O_4$  (ii) and  $MnSb_2O_4$  (iii) and  $Mn_2Sb_2O_7$  (iv).

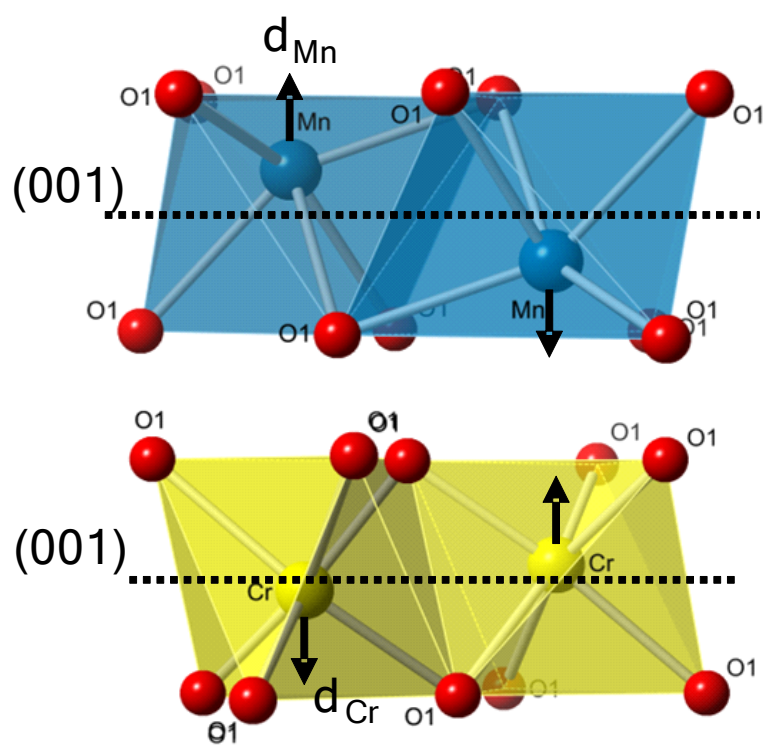

**Figure SF2.** Cation displacements off-centre of the octahedra due to cation-cation repulsions across shared faces and edges of octahedra.

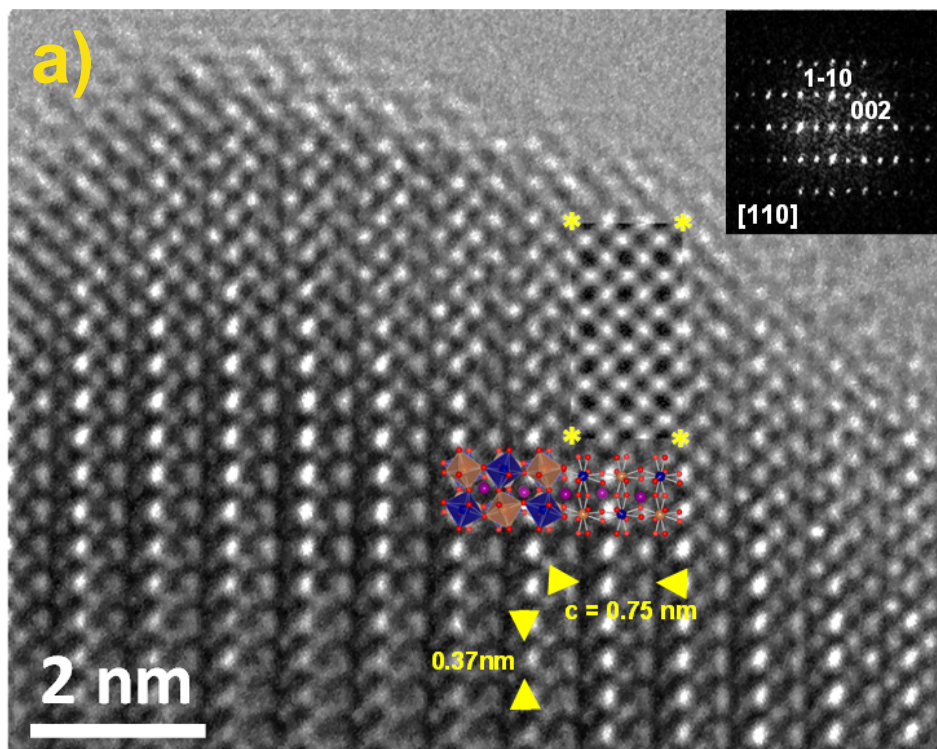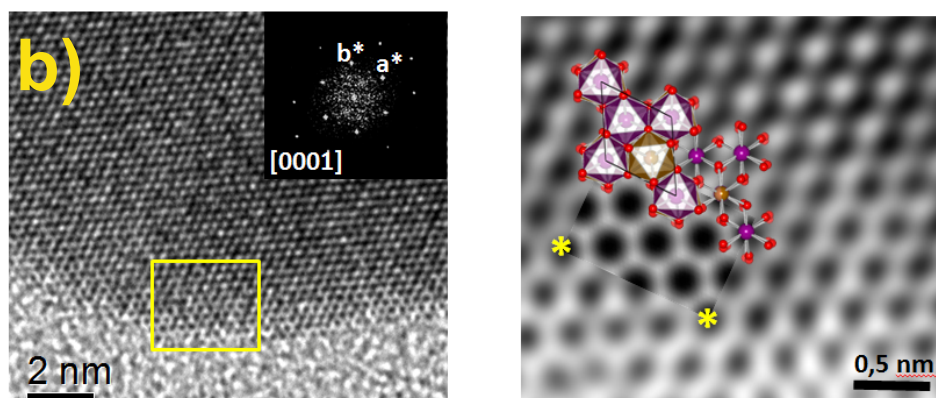

**Figure SF3.** HRTEM micrographs of the a) [110]p-perovskite and b) [0001]-ilmenite orientations.

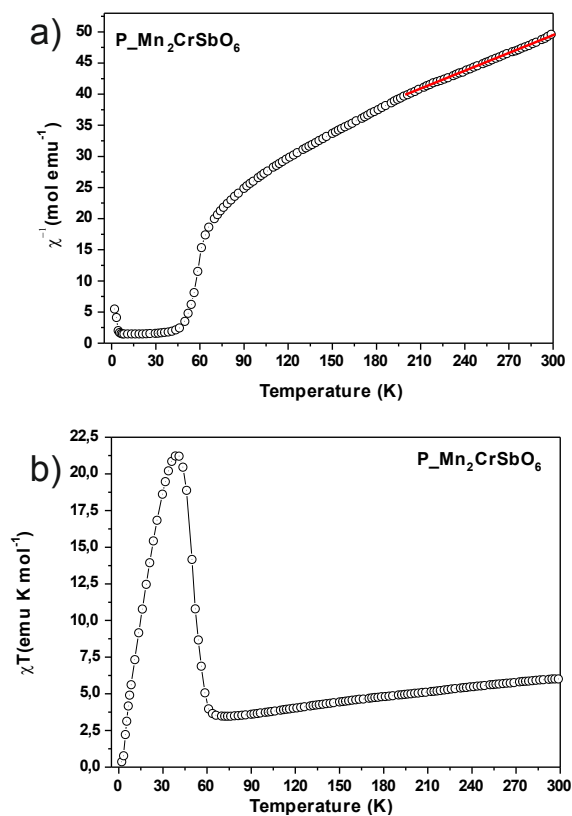

**Figure SF4.** a) Temperature dependence of the reciprocal susceptibility and b)  $\chi T$  vs.  $T$  plot for  $\text{Mn}_2\text{CrSbO}_6$  perovskite.

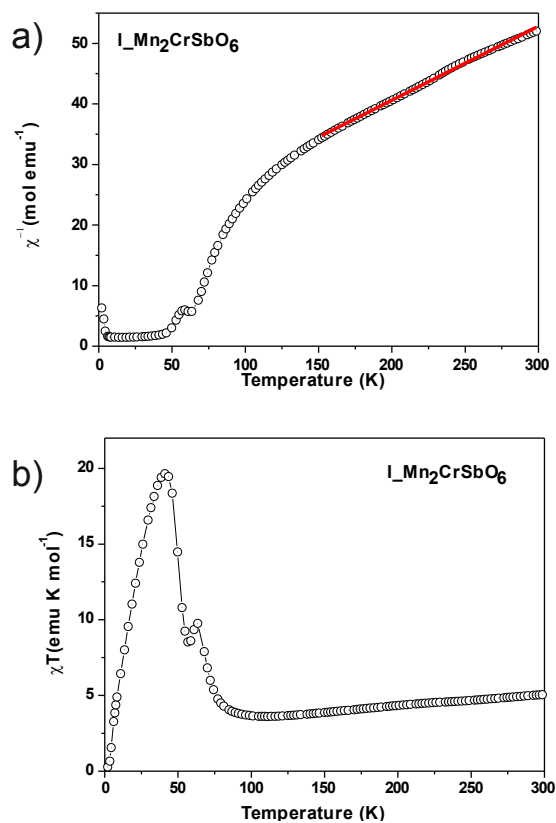

**Figure SF5.** a) Temperature dependence of the reciprocal susceptibility and b)  $\chi T$  vs.  $T$  plot for  $\text{Mn}_2\text{CrSbO}_6$  ilmenite.

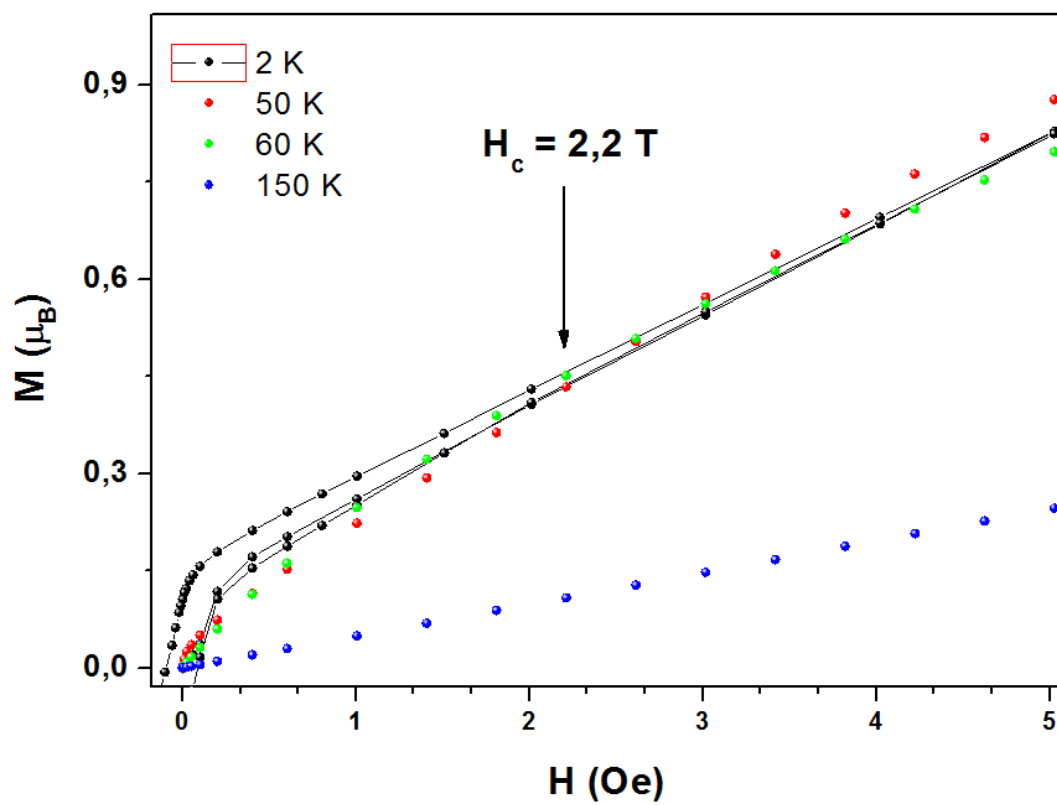

**Figure SF6.** Magnetization isotherms at 2, 50, 60 and 150 K temperatures. A metamagnetic transition occurs at  $H < 2.2 \text{ T}$ .

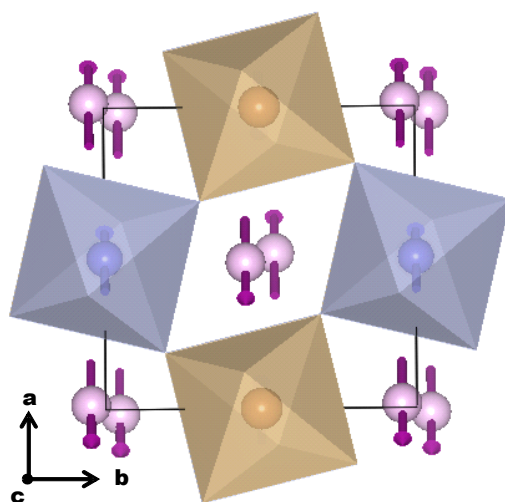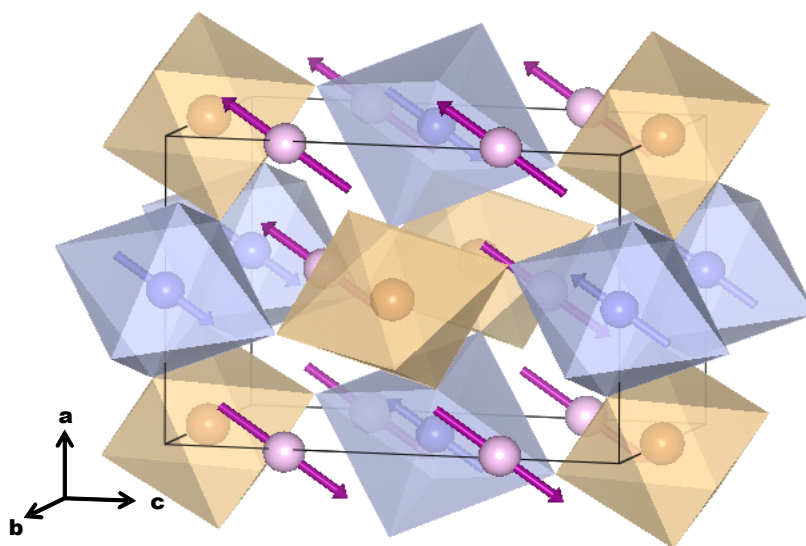

**Figure SF7.** Two different views of the magnetic structure for  $\text{Mn}_2\text{CrSbO}_6$  perovskite polymorph. Magnetic moments for Mn and Cr are represented by pink and blue arrows respectively.

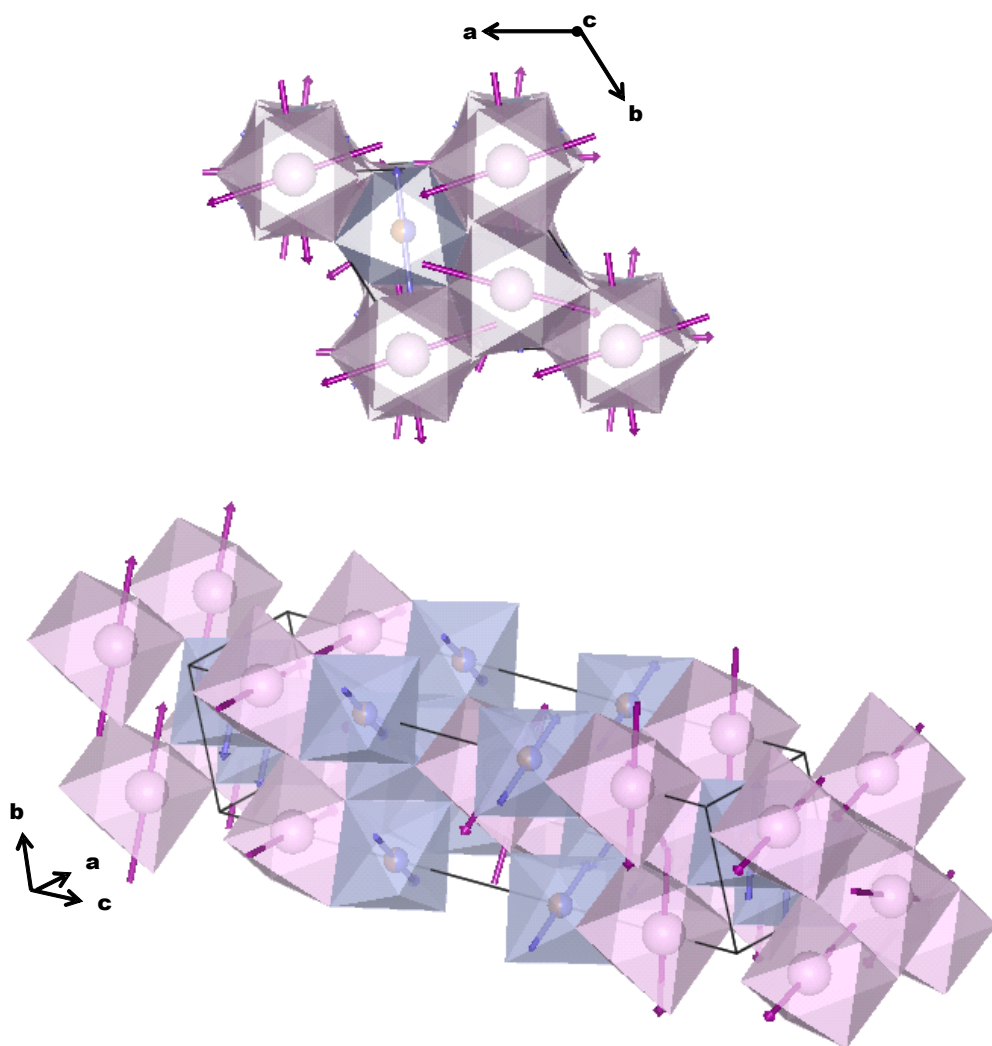

**Figure SF8.** Two different views of the magnetic structure for  $\text{Mn}_2\text{CrSbO}_6$  ilmenite polymorph. Magnetic moments for Mn and Cr are represented by pink and blue arrows respectively.
